# Supplementary material
Source: Springer Nature journal article supplement (https://www.springermedizin.de/resource/supplementary/12978_2010_257_MOESM1_ESM.pdf/9602844)
Supplement: MOESM1 [file 9602844]

Enrollment

**SCREENED** n = 80

Allocation

**MPCM** n = 40

**CONTROL** n = 40

Follow-Up

**Excluded:**  
Not adhere to intervention n=2

**Excluded:**  
Fetal malformation n=1  
Twin pregnancy n=1  
Hydrotherapy program n=3  
Prenatal caredropout n=3  
Delivery in another service n=3

Analysis

**Analyzed**  
n = 38

**Analyzed**  
n = 29
